# Supplementary material for: H 2 O assisted in improving the electrochemical performance of a deep eutectic electrolyte formed by choline chloride and magnesium chloride hexahydrate
Source: Royal Society of Chemistry journal article supplement (doi:10.1039/d4ta05504g), 2024-01-01
Supplement: d4ta05504g1.pdf [file d4ta05504g1.pdf]

**Supplementary information**

**H<sub>2</sub>O assisted to improve the electrochemical  
performance of deep eutectic electrolyte formed by  
choline chloride and magnesium chloride  
hexahydrate**

Kaixiang Zou,<sup>a,b,#</sup> Xiao Wang,<sup>b,c,#</sup> and Yuanfu Deng<sup>b,d,\*</sup>

<sup>a</sup> School of Chemical Engineering, Guizhou Minzu University, 550025, Guiyang,  
China. E-mail: zoukaixiangmu@163.com.

<sup>b</sup> School of Chemistry and Chemical Engineering, South China University of  
Technology, Guangzhou, 510640, China.

<sup>c</sup> Northwest Institute of Nuclear Technology, Xi'an 710024, China.

<sup>d</sup> Guangdong Provincial Key Laboratory of Fuel Cell Technology, Guangzhou,  
510640, China.

## Experimental Section

### *Preparation of electrode and physical characterizations:*

To ensure that the contact angle data conforms to the real situation, the prepared electrodes were adopted in the contact angle measurement. The N, O co-doped porous carbon electrode was prepared by coating the slurries on Al foils. The slurries contain 80 wt% of active materials, 10 wt.% of acetylene black and 10 wt.% of polyvinylidene fluoride (PVDF), which are uniformly dispersed in N-methyl-2-pyrrolidone (NMP).

### *Theoretical Calculations*

The root-mean-square displacement (MSD) and corresponding self-diffusion coefficient (D) of the four particles were calculated using the following formulas:

$$MSD = D t^a \quad (0 < a < 2)$$

$$D = \frac{1}{6t} \lim_{t \rightarrow \infty} \{[r(t) - r(0)]\}^2$$

Where  $t$  (ps) is the total time of the simulation process;  $a$  is a time index, commonly used to measure the particle diffusion pattern; and  $r$  (Å) is the diffusion displacement.

The relevant formulas for calculating the radial distribution function (RDF) are shown in following formulas:

$$g(r) = \frac{\frac{dN}{4\pi r^2 dr}}{\frac{N}{a \times b \times c}}$$

$$dN = \frac{g(r) \times N \times 4\pi r^2 dr}{a \times b \times c}$$

The total number of target particles in the system is denoted as  $N$ , while the length, width, and height of the theoretical calculation model are represented by  $a$  (Å),  $b$  (Å), and  $c$  (Å) respectively. Parameter  $g(r)$  describes the ratio between the number of target particles (B) existing in the shell of an A particle (A) with radius  $dr$  and the density of B particles in the entire system. It reflects how interaction intensity between particles changes with distance and its derived meaning is the probability of an A particle finding

B particles within the entire framework.  $dN$  represents the number of B particles around A particles in this shell, and its integral area can be defined as the coordination number for each particle under the assumptions that system particles are evenly distributed and truncation radius  $r$  is reasonable.

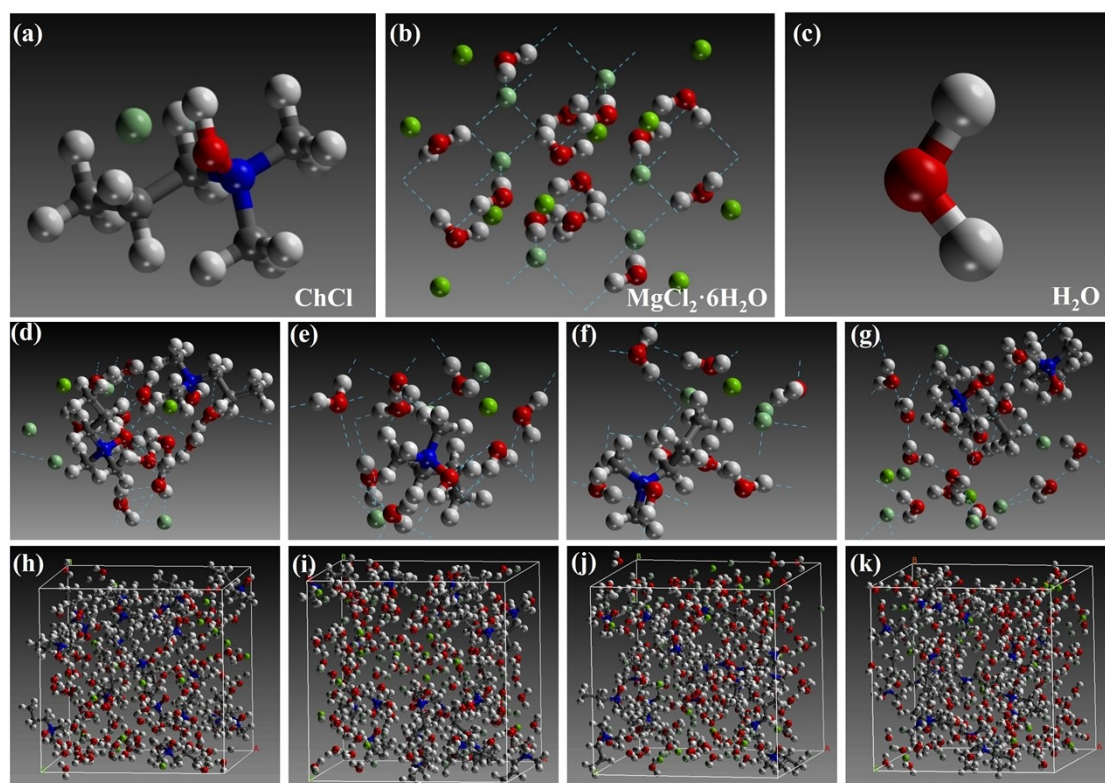

**Fig. S1** The constructed modes of (a-c) choline chloride, crystalline magnesium chloride, water, and DES systems: (d, h) DES-1, (e, i) DES-1-0.5, (f, j) DES-1-1., (g, k) DES-1-1.5

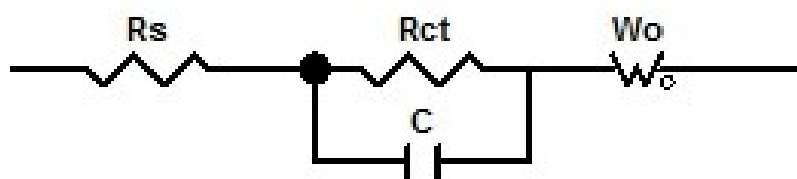

**Fig. S2** The electrical equivalent circuit for the calculation of the resistances.

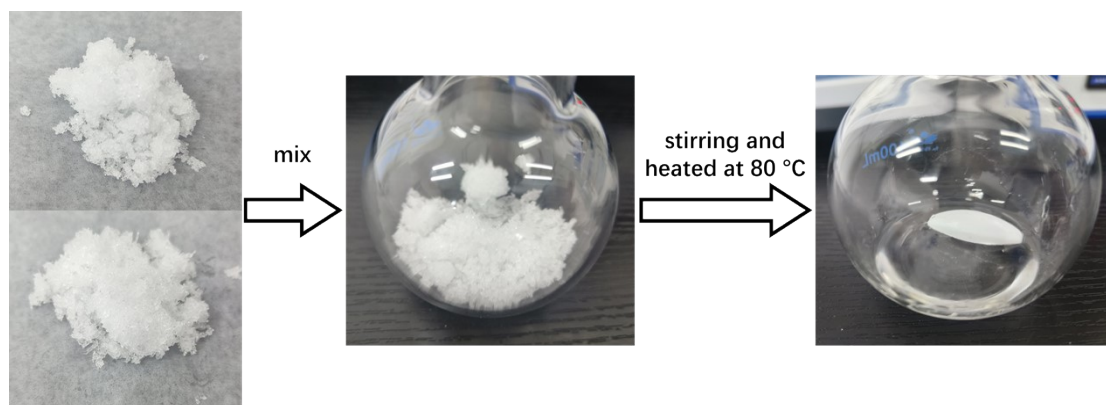

**Fig. S3** Schematic illustration of the synthesis processes of DES electrolytes.

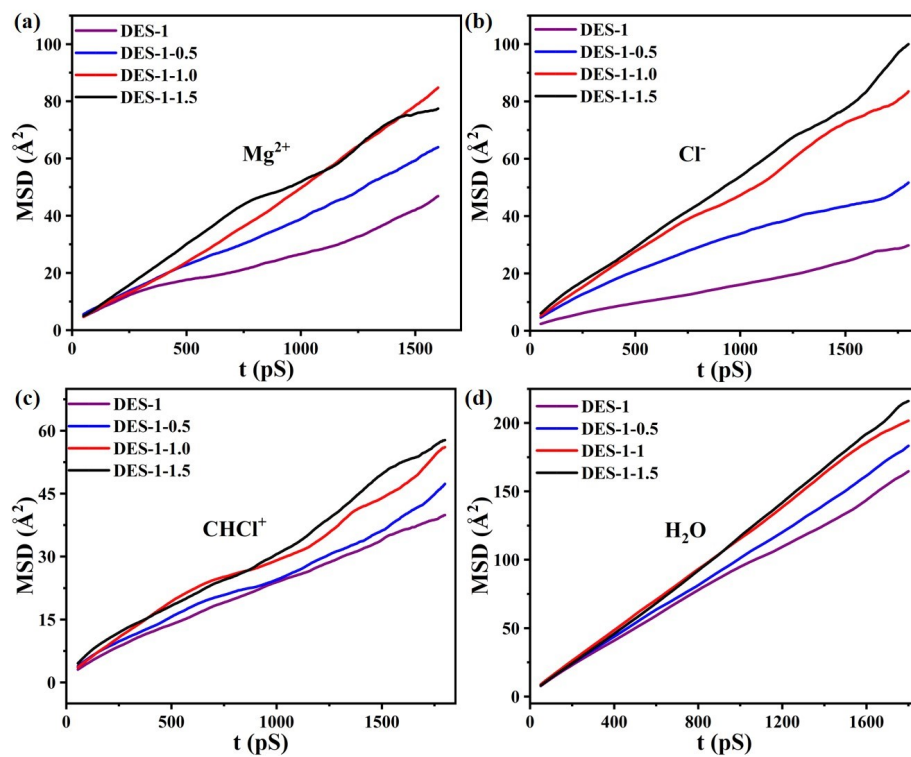

**Fig. S4** The Mean square displacement (MSD) of different atoms (a)  $\text{Mg}$ ; (b)  $\text{Cl}$ ; (c)  $\text{N}$ ; (d)  $\text{H}_2\text{O}$  in various systems

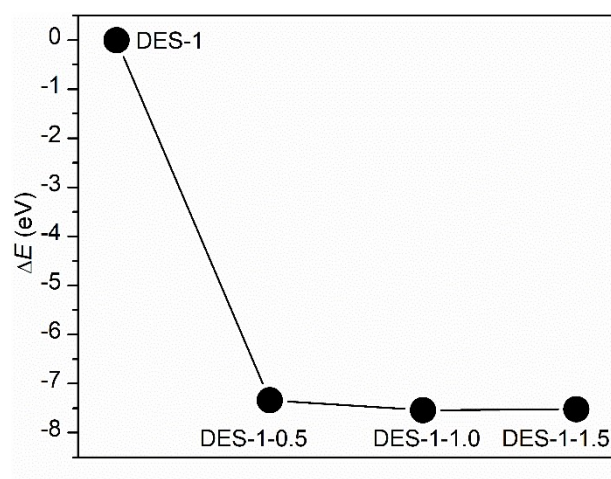

**Fig. S5.** The average adsorption energy of the DES-1, DES-1-0.5, DES-1-1.0, DES-1-1.5.



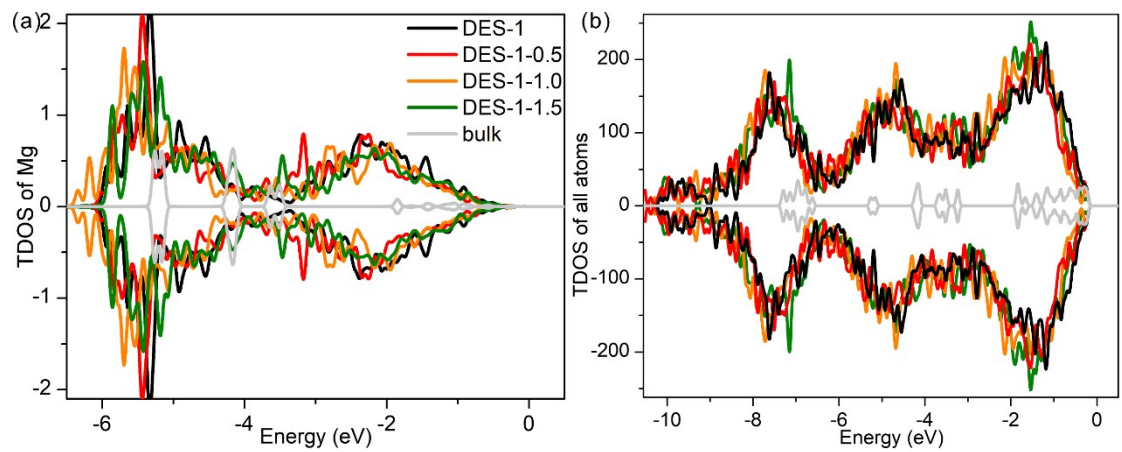

**Fig. S7.** The total density of states (TDOS). (a) TDOS of all Mg atoms, and (b) TDOS of all atoms in DES-1, DES-1-0.5, DES-1-1.0 and DES-1-1.5.

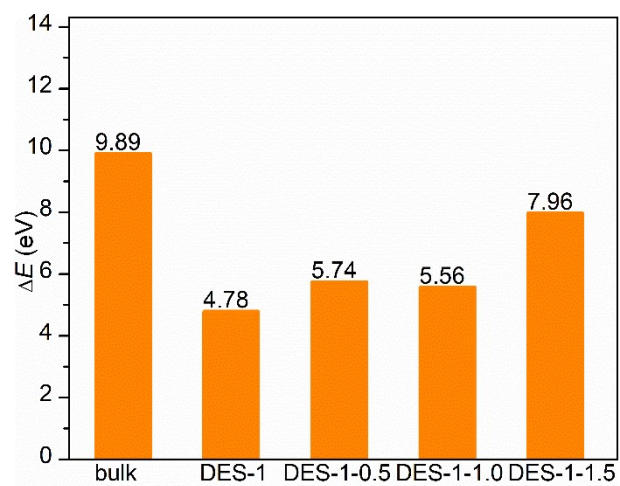

**Fig. S8.** The energy required to remove the  $\text{MgCl}_2$  unit in DES-1, DES-1-0.5, DES-1-1.0 and DES-1-1.5.

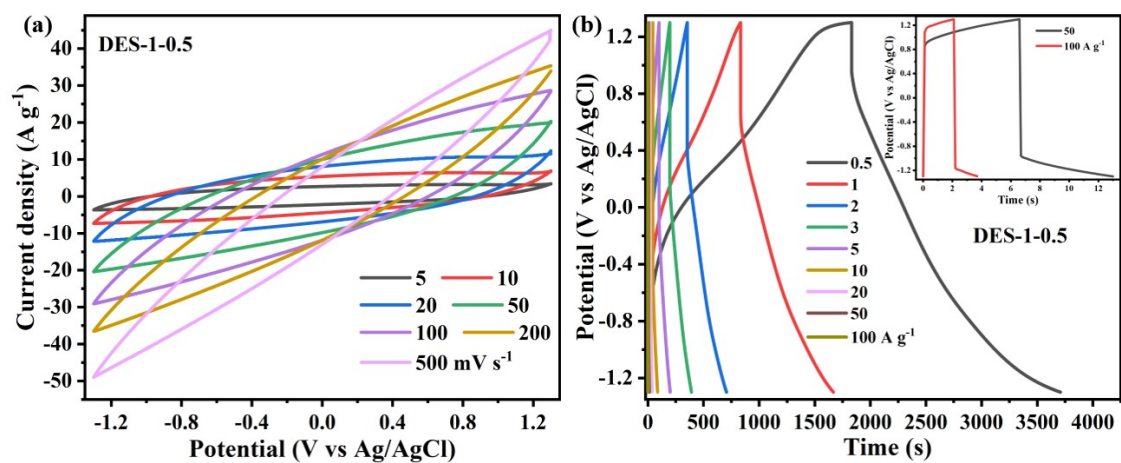

**Fig. S9** (a) CV curves at different scan rates and (b) GCD curves at different current density of the three-electrode system using DES-1-0.5 electrolyte.

**Table S1.** The calculation of the total number, average lengths and total energy of H-bonds in

DES-1, DES-1-0.5, DES-1-1.0 and DES-1-1.5.

| Sample    | N <sub>Hbond</sub> | Average (Å) | E <sub>Hbond</sub> (eV) |
|-----------|--------------------|-------------|-------------------------|
| DES-1     | 220                | 2.09        | -156.77                 |
| DES-1-0.5 | 237                | 2.07        | -159.58                 |
| DES-1-1.0 | 252                | 2.03        | -165.16                 |
| DES-1-1.5 | 268                | 2.04        | -166.89                 |

**Table S2.** Relative concentrations of H-bonds in DES-1, DES-1-0.5, DES-1-1.0 and DES-1-1.5

| Raman shift<br>(cm <sup>-1</sup> ) | DES-1  | DES-1-0.5 | DES-1-1.0 | DES-1-1.5 |
|------------------------------------|--------|-----------|-----------|-----------|
| 3215                               | 21.50% | 22.14%    | 20.96%    | 19.57%    |
| 3386                               | 62.60% | 60.89%    | 59.49%    | 55.55%    |
| 3484                               | 14.20% | 14.64%    | 17.10%    | 21.87%    |
| 3578                               | 1.26%  | 1.18%     | 1.26%     | 1.59%     |
| 3644                               | 0.44%  | 1.16%     | 1.20%     | 1.43%     |

| Sample               | DES-1 | DES-1-0.5 | DES-1-1.0 | DES-1-1.5 |
|----------------------|-------|-----------|-----------|-----------|
| Viscosity (Pa s)     | 1.802 | 0.464     | 0.074     | 0.037     |
| Conductivity (mS/cm) | 2.75  | 6.45      | 14.59     | 18.36     |

**Table S3.** Viscosity and conductivity of DES-1, DES-1-0.5, DES-1-1.0 and DES-1-1.5

**Table. S4** Comparisons of electrochemical performances of the recently reported symmetric SCs using other state-of-the-art electrolytes.

| Sample                                            | Electrolytes                                  | Operating Voltage window (V) | Energy density (Wh/kg) | Power density (kW/kg) | Ref.             |
|---------------------------------------------------|-----------------------------------------------|------------------------------|------------------------|-----------------------|------------------|
| Three-dimensional graphene like material          | Reline DES                                    | 2.2                          | 19.5                   | 1                     | 20               |
| Active carbon                                     | NaNO <sub>3</sub> /Formamide DES              | 2.6                          | 12.55                  | 17.37                 | 21               |
| Active carbon                                     | 37 mol/kg KFSI in H <sub>2</sub> O            | 2.3                          | 20.5                   | 2.3                   | 46               |
| YP-50F                                            | 17 M NaClO <sub>4</sub> in H <sub>2</sub> O   | 2.3                          | 23.7                   | 1.15                  | 47               |
| N/O/S ternary-doped porous carbon                 | 7 M LiTFSI in H <sub>2</sub> O                | 2.3                          | 34.3                   | 0.575                 | 48               |
| Hierarchically porous carbon                      | EMIMBF <sub>4</sub> in FEC/EA (1:1 in volume) | 2.5                          | 35.7                   | 21.1                  | 49               |
| Activated carbon                                  | SBS-g-PEGBEM                                  | 2.4                          | 28.1                   | 3.08                  | 50               |
| <b>N, O co-doped hierarchically porous carbon</b> | <b>DES-1-1.0</b>                              | <b>2.6</b>                   | <b>87.7</b>            | <b>1.69</b>           | <b>This work</b> |
